# Supplementary material
Source: PubMed Central journal article supplement (PMC6903404)
Supplement: NIHMS1530206-supplement-Supplemental_Material.pdf [file NIHMS1530206-supplement-Supplemental_Material.pdf]

**SUPPLEMENTAL MATERIAL**

**eTable 1. Statin Treatment within Major Treatment Groups**

| Statin Treatment Groups                                  | Overall (n=5693)         |                        | p-value |
|----------------------------------------------------------|--------------------------|------------------------|---------|
|                                                          | Female Patients (n=2460) | Male Patients (n=3233) |         |
| Patients with ASCVD                                      | n=1157                   | n=2027                 |         |
| On any statin                                            | 890 (76.9%)              | 1728 (85.3%)           | <.0001  |
| Patients with LDL-C $\geq$ 190 mg/dL                     | n=77                     | n=31                   |         |
| On any statin                                            | 31 (40.3%)               | 10 (32.3%)             | 0.44    |
| Patients with Diabetes*                                  | n=696                    | n=592                  |         |
| On any statin                                            | 466 (67.0%)              | 437 (73.8%)            | 0.007   |
| Patients with calculated ASCVD 10-year risk $\geq$ 7.5%* | n=541                    | n=585                  |         |
| On any statin                                            | 266 (49.2%)              | 365 (62.4%)            | <.0001  |

\*Age 40-75 years old and with LDL-C>70 mg/dL or on a statin

**eTable 2. Adjusted ORs for Variables Included in the Model of Statin Treatment**

| <b>Variable</b>   | <b>Group</b>               | <b>OR (95% CI)</b> | <b>p-value</b> |
|-------------------|----------------------------|--------------------|----------------|
| Sex               | Female vs. male            | 0.7 (0.61,0.81)    | <.0001         |
| Age $\geq$ 65     | Per year increase          | 1.02 (1,1.04)      | 0.0179         |
| Age <65           | Per year increase          | 0.96 (0.95,0.98)   | <.0001         |
| Race              | African American vs. white | 0.88 (0.68,1.13)   | 0.3035         |
|                   | Other vs. white            | 0.94 (0.58,1.54)   | 0.8163         |
| Prior CHD         | Yes vs. no                 | 2.57 (2.12,3.11)   | <.0001         |
| Prior TIA/stroke  | Yes vs. no                 | 1.45 (1.09,1.94)   | 0.0106         |
| Prior other ASCVD | Yes vs. no                 | 1.22 (0.96,1.56)   | 0.1054         |
| Diabetes          | Yes vs. no                 | 1.68 (1.45,1.95)   | <.0001         |
| Smoker            | 1=Current vs. never        | 0.99 (0.81,1.21)   | 0.9022         |
|                   | 2=Quit vs. never           | 0.97 (0.82,1.16)   | 0.7619         |
| HTN               | Yes vs. no                 | 1.56 (1.26,1.92)   | <.0001         |
| HF                | Yes vs. no                 | 0.85 (0.66,1.09)   | 0.1920         |
| BMI $\geq$ 30     | Yes vs. no                 | 0.96 (0.85,1.08)   | 0.4847         |

|                               |                                  |                  |        |
|-------------------------------|----------------------------------|------------------|--------|
| Income                        | 1:<\$35,000 vs. ≥100,000         | 0.9 (0.68,1.21)  | 0.4972 |
|                               | 2:\$35,000-\$74,999 vs. ≥100,000 | 1 (0.78,1.27)    | 0.9812 |
|                               | 3:\$75,000-\$99,999 vs. ≥100,000 | 1.05 (0.79,1.39) | 0.7358 |
| College                       | Yes vs. no                       | 0.96 (0.81,1.12) | 0.5803 |
| Insurance                     | Government vs. private           | 1.06 (0.92,1.23) | 0.4216 |
|                               | Other(non-US)/none vs. private   | 0.46 (0.29,0.73) | 0.0012 |
| Numeracy                      | 0=0-12 vs. 4= >21                | 0.96 (0.78,1.19) | 0.7216 |
|                               | 1=13-16 vs. 4= >21               | 0.89 (0.71,1.12) | 0.3333 |
|                               | 2=17-21 vs. 4= >21               | 0.97 (0.77,1.21) | 0.7588 |
| Worry about heart disease     | Yes vs. no                       | 0.94 (0.81,1.09) | 0.4172 |
| Trust physician               | Yes vs. no                       | 1.07 (0.92,1.24) | 0.3717 |
| Believe statins are effective | 1:disagree vs. agree             | 0.73 (0.49,1.09) | 0.1180 |
|                               | 2:neutral vs. agree              | 0.43 (0.36,0.52) | <.0001 |
| Believe statins are safe      | 1:disagree vs. agree             | 0.26 (0.2,0.34)  | <.0001 |
|                               | 2:neutral vs. agree              | 0.45 (0.38,0.53) | <.0001 |

|                                                                     |                      |                  |        |
|---------------------------------------------------------------------|----------------------|------------------|--------|
| Believe increased cholesterol increases the risk for a heart attack | 1:disagree vs. agree | 1.02 (0.79,1.33) | 0.8668 |
|                                                                     | 2:neutral vs. agree  | 1.36 (1.08,1.7)  | 0.0076 |
| Provider in practice for >5 years                                   | Yes vs. no           | 1.11 (0.79,1.56) | 0.5264 |
| Practice location                                                   | Rural vs. urban      | 0.79 (0.47,1.31) | 0.3588 |
| Provider follows the 2013 ACC/AHA guideline                         | Yes vs. no           | 0.99 (0.77,1.27) | 0.9355 |
| Provider is a cardiologist                                          | Yes vs. no           | 1.26 (0.99,1.6)  | 0.0560 |

---

ACC/AHA = American College of Cardiology/American Heart Association; ASCVD = atherosclerotic cardiovascular disease; BMI = body mass index; CHD = coronary heart disease; CI = confidence interval; HF = heart failure; HTN = hypertension; OR = odds ratio; TIA = transient ischemic attack; US = United States

**eTable 3. Adjusted ORs for Variables Included in the Model of Guideline-Recommended Statin Treatment.**

| <b>Variable</b>   | <b>Group</b>               | <b>OR (95% CI)</b> | <b>p-value</b> |
|-------------------|----------------------------|--------------------|----------------|
| Sex               | Female vs. male            | 0.82 (0.73,0.92)   | 0.0008         |
| Age $\geq$ 65     | Per year increase          | 0.96 (0.94,0.98)   | <.0001         |
| Age <65           | Per year increase          | 1.08 (1.07,1.1)    | <.0001         |
| Race              | African American vs. white | 0.85 (0.67,1.07)   | 0.1587         |
|                   | Other vs. white            | 0.86 (0.55,1.34)   | 0.5031         |
| Prior CHD         | Yes vs. no                 | 1.13 (0.95,1.34)   | 0.1620         |
| Prior TIA/stroke  | Yes vs. no                 | 1.1 (0.9,1.34)     | 0.3492         |
| Prior Other ASCVD | Yes vs. no                 | 0.9 (0.76,1.07)    | 0.2491         |
| Diabetes          | Yes vs. no                 | 0.73 (0.62,0.86)   | 0.0002         |
| Smoker            | 1=Current vs. never        | 0.93 (0.75,1.15)   | 0.5063         |
|                   | 2=Quit vs. never           | 0.96 (0.84,1.1)    | 0.5829         |
| HTN               | Yes vs. no                 | 1.11 (0.94,1.32)   | 0.2209         |
| HF                | Yes vs. no                 | 0.96 (0.77,1.19)   | 0.7078         |
| BMI $\geq$ 30     | Yes vs. no                 | 1.02 (0.89,1.16)   | 0.7817         |

|                               |                                  |                  |        |
|-------------------------------|----------------------------------|------------------|--------|
| Income                        | 1:<\$35,000 vs. ≥100,000         | 0.7 (0.54,0.9)   | 0.0060 |
|                               | 2:\$35,000-\$74,999 vs. ≥100,000 | 0.82 (0.67,1.01) | 0.0563 |
|                               | 3:\$75,000-\$99,999 vs. ≥100,000 | 0.87 (0.7,1.07)  | 0.1823 |
| College                       | Yes vs. no                       | 1.01 (0.88,1.16) | 0.9073 |
| Insurance                     | Government vs. private           | 0.97 (0.86,1.1)  | 0.6230 |
|                               | Other(non-US)/none vs. private   | 0.71 (0.48,1.06) | 0.0930 |
| Numeracy                      | 0=0-12 vs. 4= >21                | 1.17 (0.96,1.42) | 0.1168 |
|                               | 1=13-16 vs. 4= >21               | 1.04 (0.86,1.26) | 0.6908 |
|                               | 2=17-21 vs. 4= >21               | 0.99 (0.83,1.17) | 0.8963 |
| Worry about heart disease     | Yes vs. no                       | 1 (0.88,1.13)    | 0.9549 |
| Trust physician               | Yes vs. no                       | 1.1 (0.96,1.27)  | 0.1806 |
| Believe statins are effective | 1:disagree vs. agree             | 0.75 (0.51,1.09) | 0.1300 |
|                               | 2:neutral vs. agree              | 0.59 (0.5,0.7)   | <.0001 |
| Believe statins are safe      | 1:disagree vs. agree             | 0.45 (0.35,0.57) | <.0001 |
|                               | 2:neutral vs. agree              | 0.65 (0.56,0.75) | <.0001 |

|                                                                     |                      |                  |        |
|---------------------------------------------------------------------|----------------------|------------------|--------|
| Believe increased cholesterol increases the risk for a heart attack | 1:disagree vs. agree | 1.06 (0.82,1.37) | 0.6542 |
|                                                                     | 2:neutral vs. agree  | 1.1 (0.93,1.3)   | 0.2830 |
| Provider in practice for >5 years                                   | Yes vs. no           | 1.08 (0.84,1.39) | 0.5425 |
| Practice location                                                   | Rural vs. urban      | 0.7 (0.44,1.11)  | 0.1295 |
| Provider follows the 2013 ACC/AHA guideline                         | Yes vs. no           | 0.94 (0.79,1.11) | 0.4707 |
| Provider is a cardiologist                                          | Yes vs. no           | 1.18 (0.96,1.44) | 0.1181 |

---

ACC/AHA = American College of Cardiology/American Heart Association; ASCVD = atherosclerotic cardiovascular disease; BMI = body mass index; CHD = coronary heart disease; CI = confidence interval; HF = heart failure; HTN = hypertension; OR = odds ratio; TIA = transient ischemic attack; US = United States
